# Supplementary material for: Thermodynamic interpretation of catalytic transformation of levulinic acid over supported perovskites catalysts: Dynamic equilibrium and nonlinear Arrhenius behavior investigation
Source: Research Square preprint supplement (doi:10.21203/rs.3.rs-6828523/v1), 2025-06-18
Supplement: Supplementary file 1 [file 0b50d465f931431a30992109.docx]

# Supporting Information

# Thermodynamic interpretation of catalytic transformation of levulinic acid over supported perovskites catalysts: Dynamic equilibrium and nonlinear Arrhenius behaviour investigation

Tsholofelo Lepedi a, Mulisa Maumela b, Qiangqiang Xiao c, Busiswa Ndaba d, Ndzondelelo Bingwa d,*

a Centre for Synthesis and Catalysis, Department of Chemical Sciences, University of Johannesburg, Johannesburg, PO BOX 254, South Africa

b Department of Mathematics, Science and Technology Education, University of Limpopo, South Africa, Private Bag x1106, Sovenga, 0727

c School of Thermal Engineering, Shandong Jianzhu University, Jinan, 250101, PR China

d Institute for Catalysis and Energy solutions, College of Science Engineering and Technology, University of South Africa, Florida Campus, Roodepoort, 1709, South Africa

*Corresponding Author: N.B bingwns@unisa.ac.za

***Characterization techniques and sample preparation***

For the powder X-ray analysis, the catalysts were pounded into fine powder and the Philips X’Pert Pro from PANalytical utilizing the def_sa5m method was used. For analysis, a Cu Kα1 radiation was utilized at λ = 1.54 nm with the working conditions of 40 mA and 40 kV. The wide-angle diffraction was chosen during analysis.

For studying the morphology of the catalysts, the transmission electron microscope was utilized. The Joel Jem 2100F was operated at 200 kV. The sample was mixed with ethanol and placed in an ultrasonic bath for 1 h. After the hour had elapsed the sample was placed on a copper grid, dried at room temperature, and the catalyst was ready for analysis.

In terms of scanning electron microscope, the Tescan Vega 3LMH coupled with INCA energy dispersive X-ray analysis was utilized during the analysis of the surface of the material. A 20 kV was utilized with a working distance of 15 mm. For sample preparation prior analysis, the sample was placed on a sample stub which was covered by a black tape. The sample was then placed in a sputter coater and carbon-coated using an Agar Turbo Carbon Coater

For the Fourier transform infrared spectroscopy analysis, the Shimadzu IR Affinity-1S was used. The material had to be grinded into fine powder before analysis.

The nitrogen sorption studies were conducted on the Micromeritics Tristar(ii) porosity analyzer instrument. The samples were degassed under nitrogen flow at 393.15 K for 6 h and analysis was conducted in liquid nitrogen at 77 K.

***Catalysts characterization results***


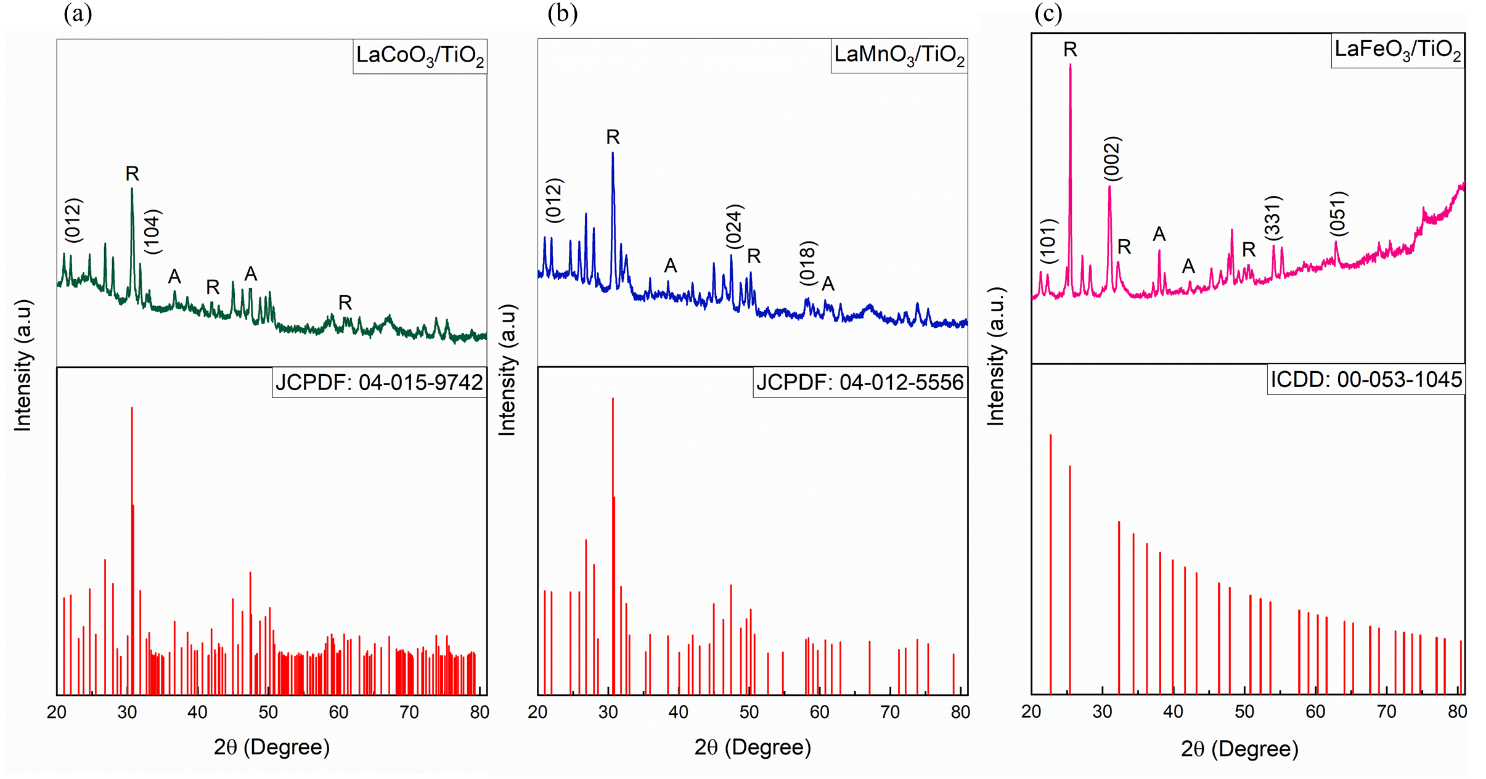


**Figure S1:** XRD patterns for the supported perovskites (a) LaCoO3/TiO2 (b) LaMnO3/TiO2 (c) LaFeO3/TiO2


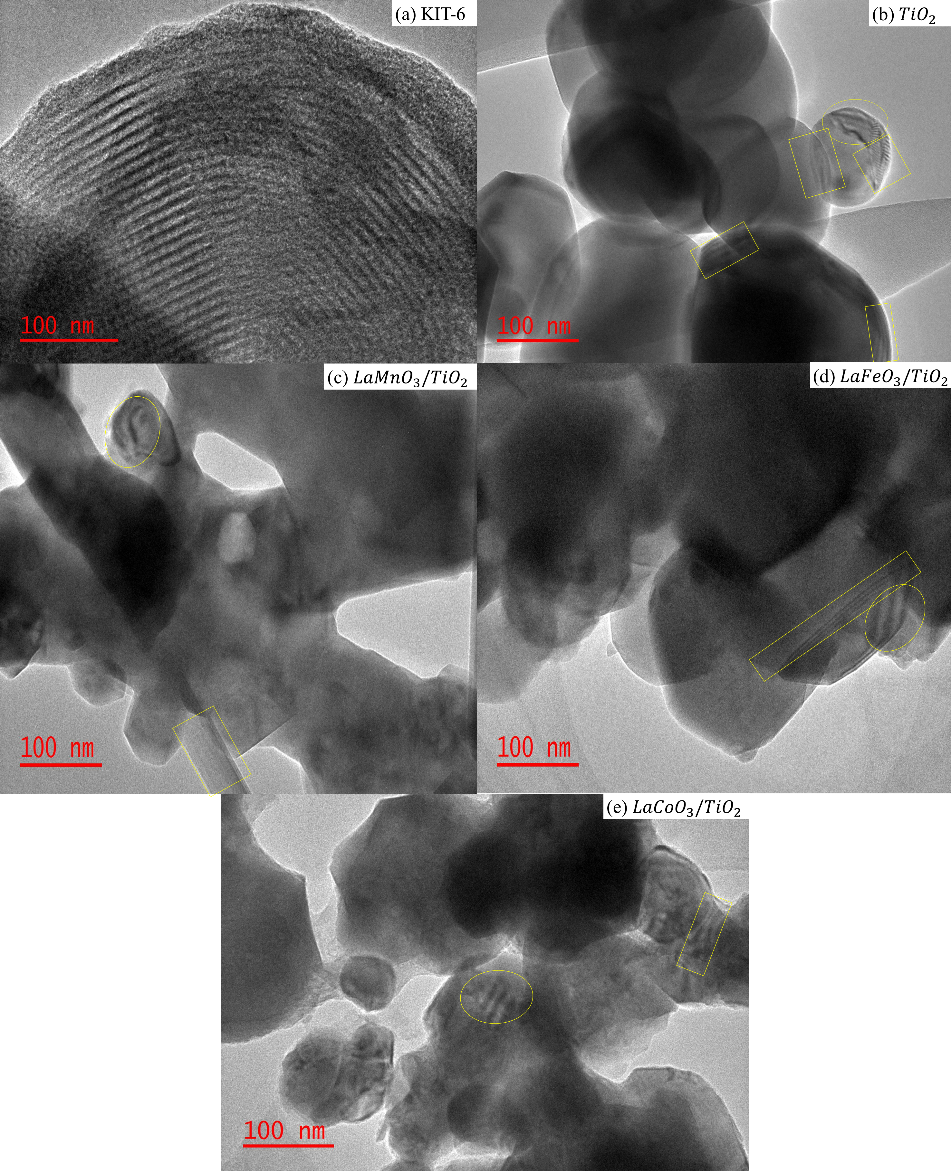


**Figure S2:** TEM images for: (a) the synthesized mesoporous hard-template, KIT-6 (b) TiO2 and the synthesized TiO2 supported heterogeneous catalysts.


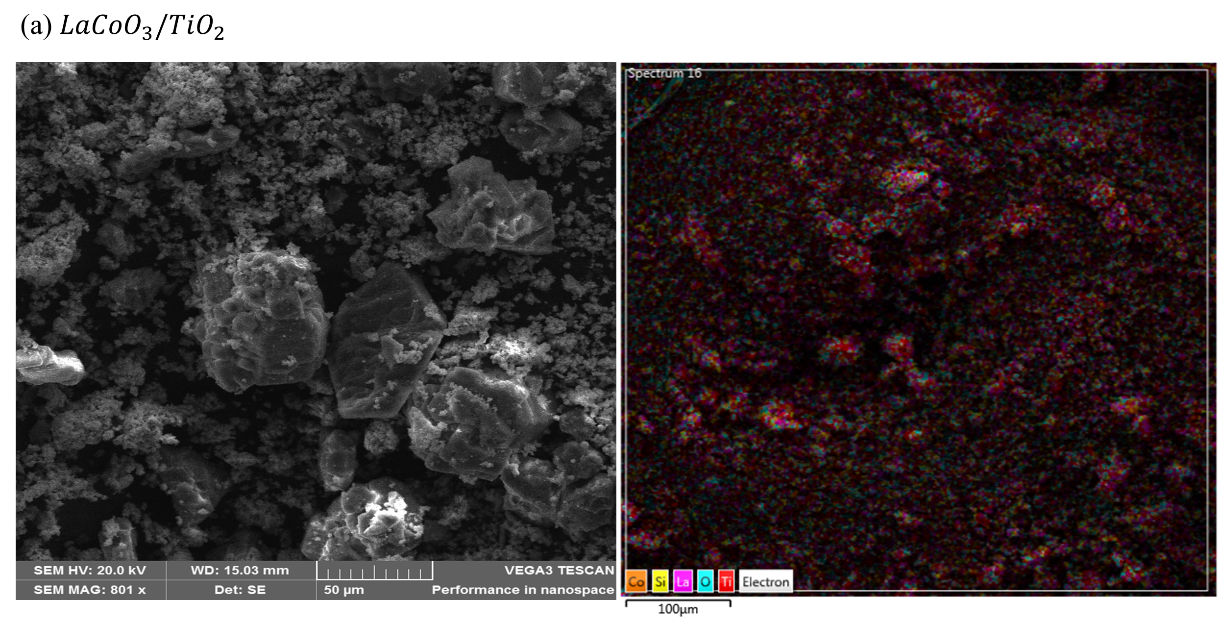


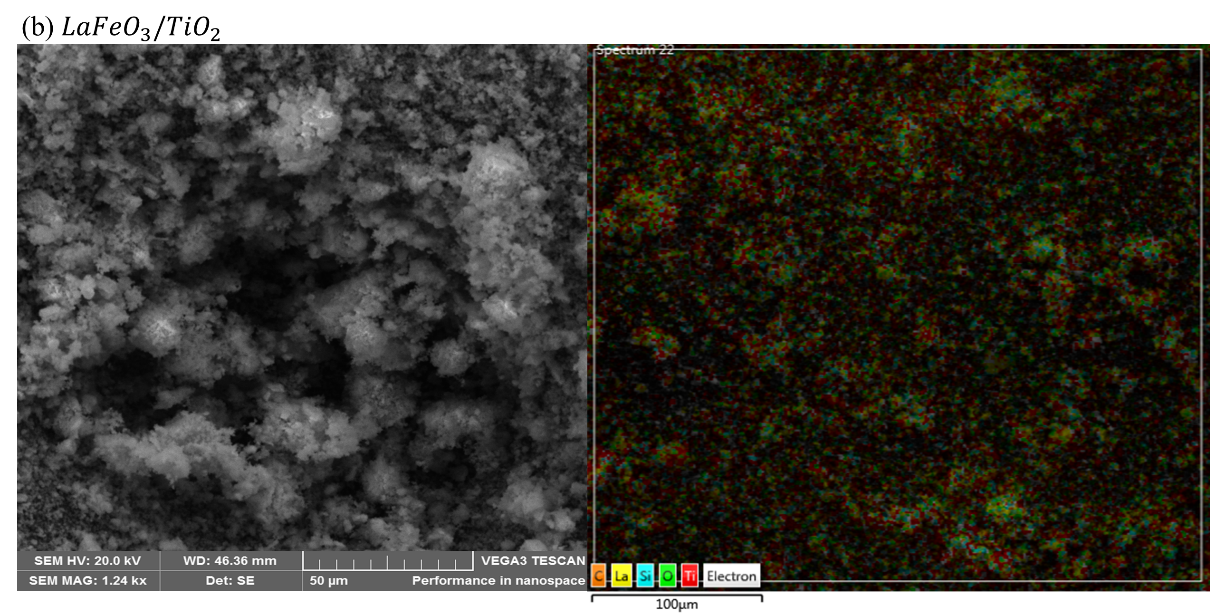


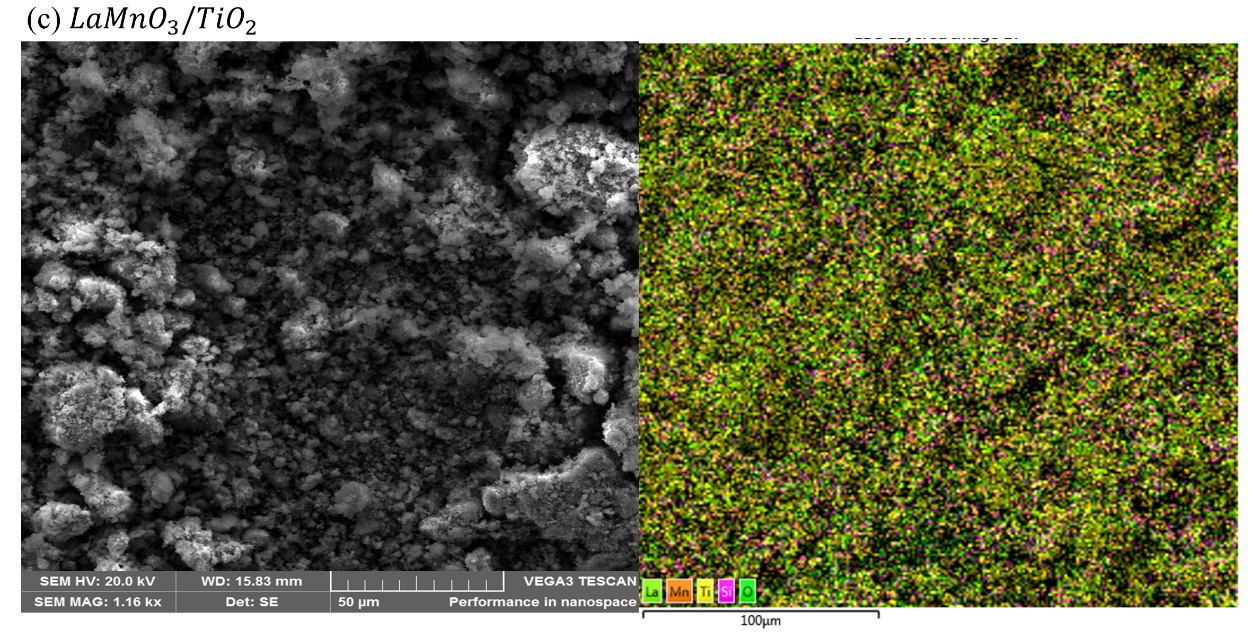


**Figure S3:** SEM and elemental mapping micrographs for: (a) LaCoO3/TiO2 (b) LaFeO3/TiO2  (c) LaMnO3/TiO2


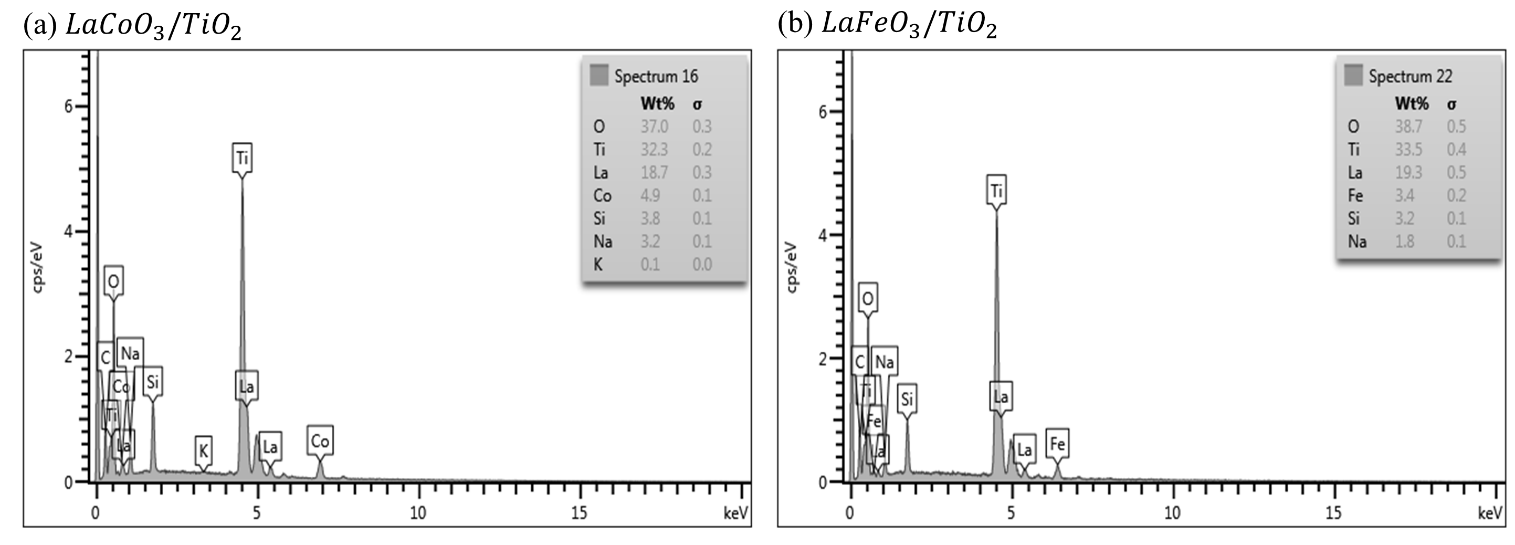


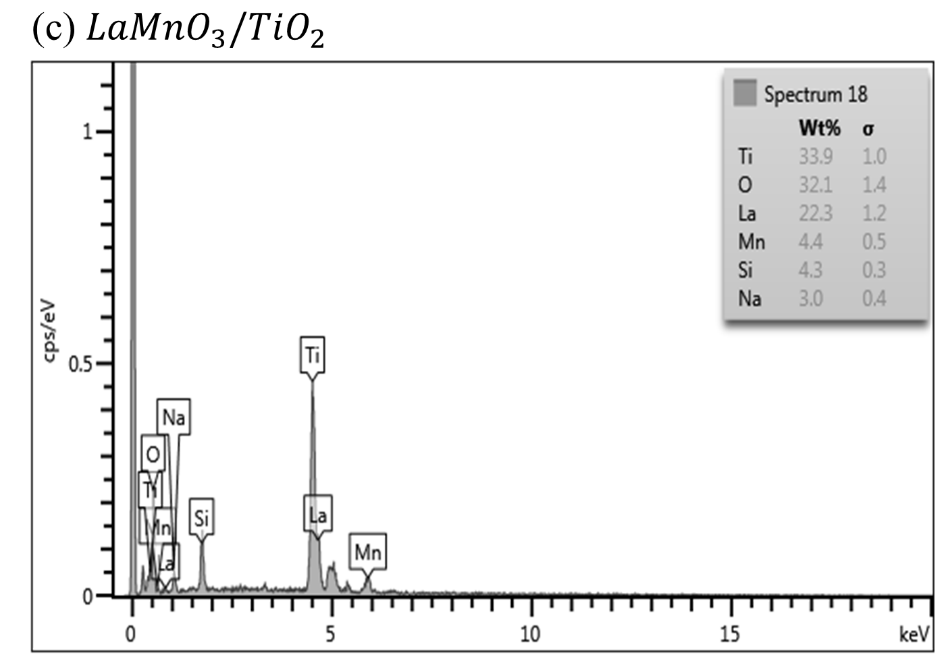


**Figure S4**: EDX results for: (a) LaCoO3/TiO2 (b) LaFeO3/TiO2 (c) LaMnO3/TiO2


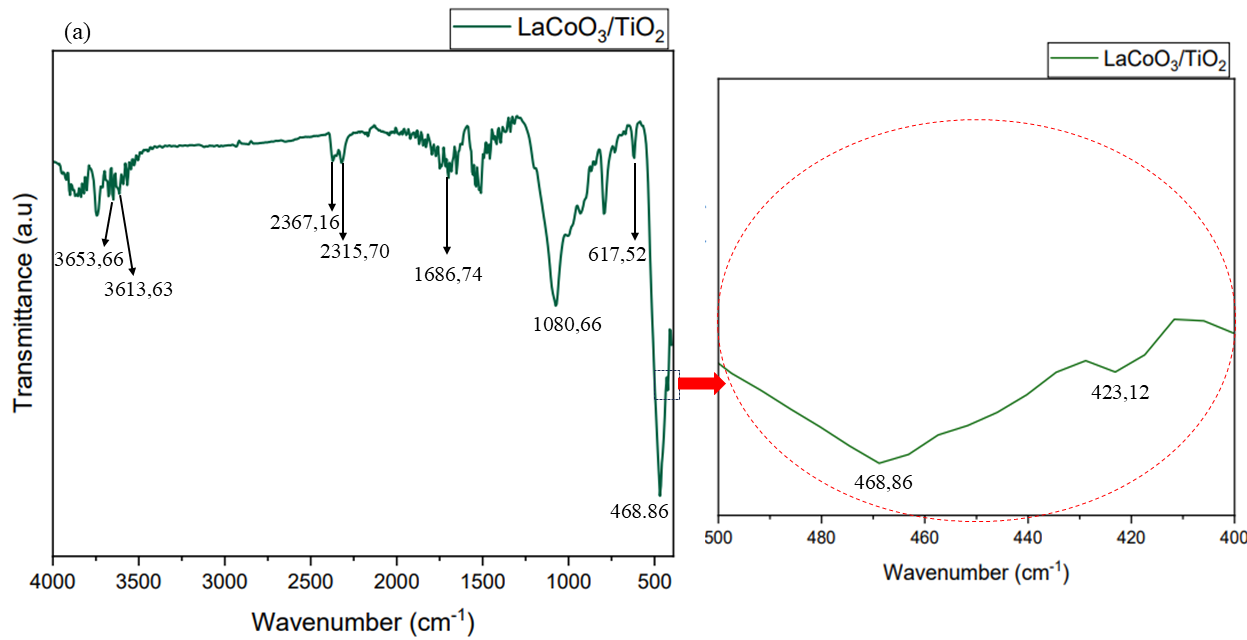


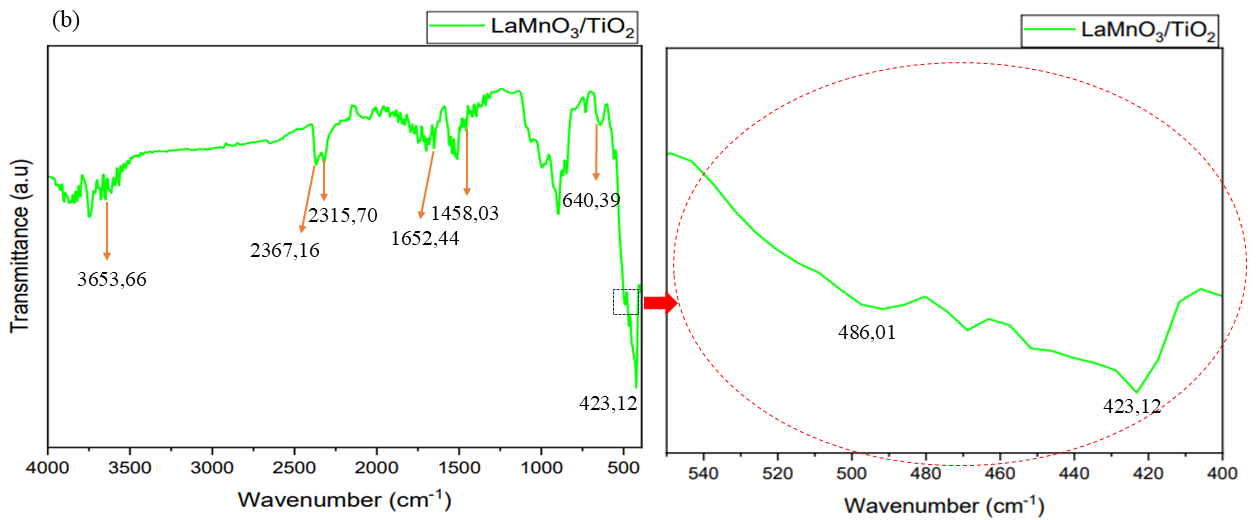


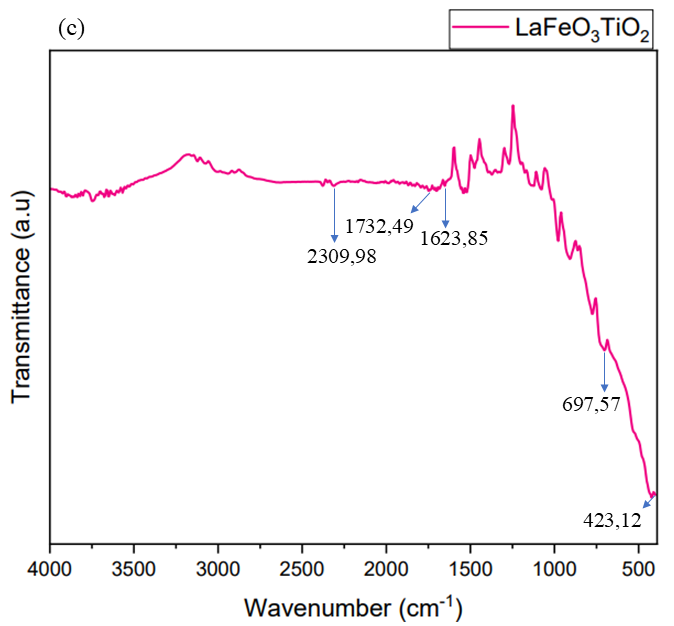


**Figure 5:** FTIR resultsobtained for: (a) LaCoO3/TiO2 (b) LaMnO3/TiO2 (c) LaFeO3/TiO2


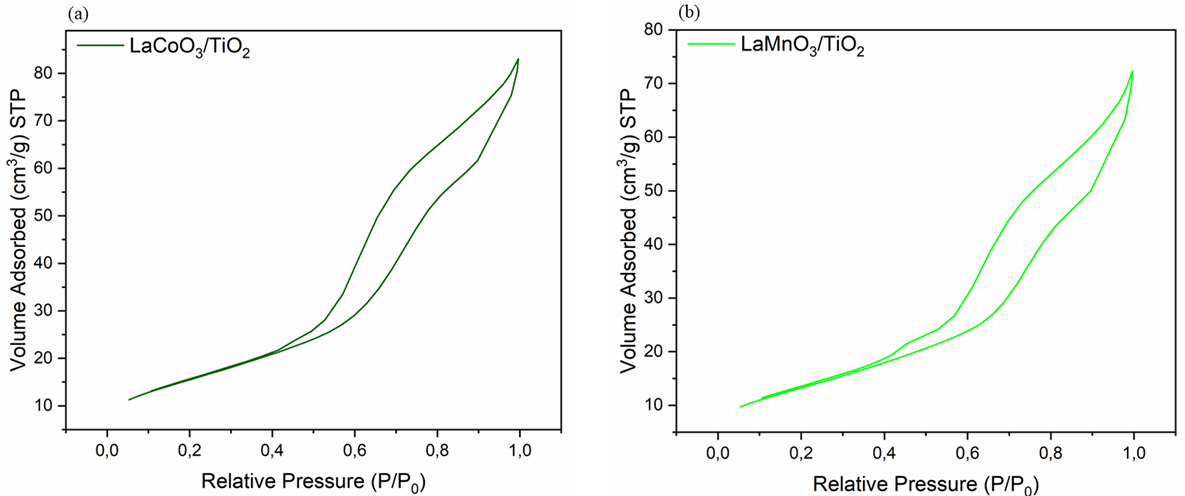


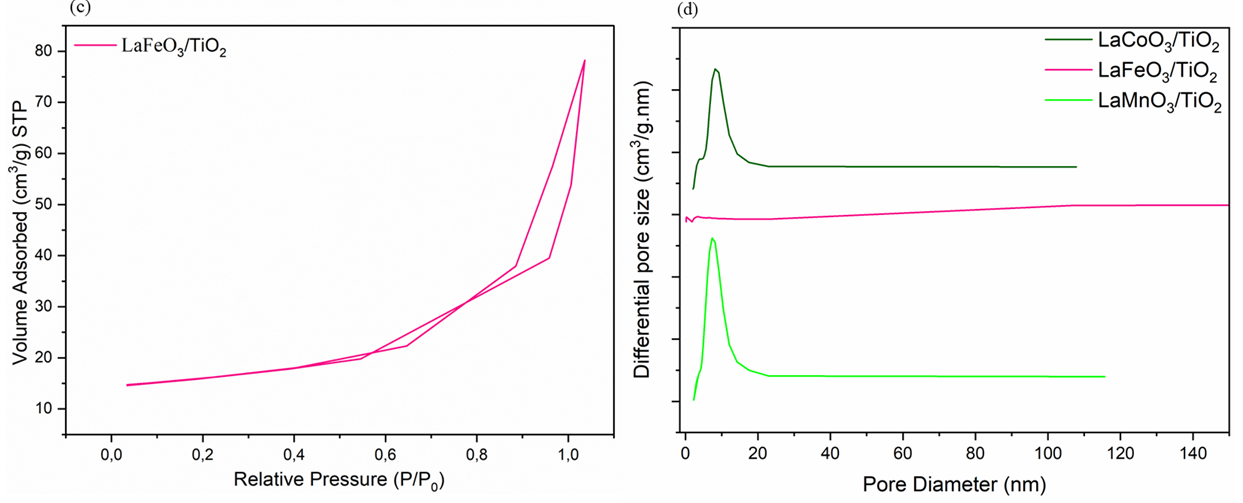


**Figure 6:** BET isotherms result for (a) LaCoO3/TiO2 (b) LaMnO3/TiO2 (c) LaFeO3/TiO2 (d) BJH adsorption cumulative pore volume graphs for the supported perovskite catalysts.
